# Supplementary material for: A beryllium-free deep-UV nonlinear optical material CsNaMgP2O7with honeycomb-like topological layers
Source: Royal Society of Chemistry journal article supplement (doi:10.1039/c8tc00415c), 2018-01-01
Supplement: c8tc00415c1.pdf [file c8tc00415c1.pdf]

Atomic coordinates for CsNaMgP2O7

|      | x      | y      | z     | x      | y      | z     |
|------|--------|--------|-------|--------|--------|-------|
| P2   | 0      | 0.06   | 0.721 | 0      | 0.9    | 6.991 |
| O4   | 0.236  | 0.092  | 0.797 | 1.236  | 1.377  | 7.729 |
| O5   | 0      | 0.113  | 0.574 | 0      | 1.689  | 5.563 |
| O2   | 0      | -0.036 | 0.684 | 0      | -0.537 | 6.638 |
| O4iv | -0.236 | 0.092  | 0.797 | -1.236 | 1.377  | 7.729 |
|      |        |        |       |        |        |       |
| P1   | 0      | 0.221  | 0.565 | 0      | 3.307  | 5.484 |
| O5   | 0      | 0.113  | 0.574 | 0      | 1.689  | 5.563 |
| O1   | 0.239  | 0.253  | 0.633 | 1.254  | 3.778  | 6.139 |
| O3   | 0      | 0.24   | 0.416 | 0      | 3.597  | 4.037 |
| O1iv | -0.239 | 0.253  | 0.633 | -1.254 | 3.778  | 6.139 |

Bond valence calculation for CsNaMgP2O7

|      | bond distances | bond valence |
|------|----------------|--------------|
| O4   | 1.516          | 1.26         |
| O5   | 1.631          | 0.968        |
| O2   | 1.479          | 1.371        |
| O4iv | 1.516          | 1.26         |
| P2   |                | 4.86         |
|      |                |              |
| O5   | 1.619          | 0.995        |
| O1   | 1.491          | 1.334        |
| O3   | 1.476          | 1.381        |
| O1iv | 1.491          | 1.334        |
| P1   |                | 5.045        |

| CsNaMgP2O7 |      |         | Cart. Coord. |        |       |          |
|------------|------|---------|--------------|--------|-------|----------|
| Z          |      | charges | x            | y      | z     | distance |
| 15         | P2   | 4.86    | 0            | 0.9    | 6.991 |          |
| 8          | O4   | -1.26   | 1.236        | 1.377  | 7.729 | 1.516    |
| 8          | O5   | -0.968  | 0            | 1.689  | 5.563 | 1.631    |
| 8          | O2   | -1.371  | 0            | -0.537 | 6.638 | 1.479    |
| 8          | O4iv | -1.26   | -1.236       | 1.377  | 7.729 | 1.516    |

| x      | y      | z      | unitized | C_grav | C_charge | u_debye |
|--------|--------|--------|----------|--------|----------|---------|
| 0.815  | 0.315  | 0.487  | 1        | 0.348  | 0.477    | 15.906  |
| 0      | 0.484  | -0.875 | 1.001    | 0.348  | 0.469    | 16.336  |
| 0      | -0.972 | -0.239 | 1.001    | 0.348  | 0.48     | 15.77   |
| -0.815 | 0.315  | 0.487  | 1        | 0.348  | 0.477    | 15.906  |

|        |                 |         |           |                           |          |          |
|--------|-----------------|---------|-----------|---------------------------|----------|----------|
|        | Dipole Moment   |         | Magnitude |                           |          |          |
| x      | y               | z       |           |                           |          |          |
| 0      | 2.594           | -2.576  | 3.656     | esu*cm                    |          |          |
|        | Cell Volume     |         | 760.05    |                           |          |          |
|        | Z               |         | 4         |                           |          |          |
|        | Dipole Moment = |         | 0.019     | esu*cm/A^3                |          |          |
|        | pm/V            |         | 4.59E+07  | conversion to pm/V cm/A^3 |          |          |
|        | Cart. Coord.    |         |           |                           |          |          |
| Z      |                 | charges | x         | y                         | z        | distance |
| 15     | P1              | 5.045   | 0         | 3.307                     | 5.484    |          |
| 8      | O5              | -0.995  | 0         | 1.689                     | 5.563    | 1.619    |
| 8      | O1              | -1.334  | 1.254     | 3.778                     | 6.139    | 1.491    |
| 8      | O3              | -1.381  | 0         | 3.597                     | 4.037    | 1.476    |
| 8      | Oliv            | -1.334  | -1.254    | 3.778                     | 6.139    | 1.491    |
| x      | y               | z       | unitized  | C_grav                    | C_charge | u_debye  |
| 0      | -0.999          | 0.049   | 1         | 0.348                     | 0.475    | 16.718   |
| 0.841  | 0.316           | 0.439   | 1         | 0.348                     | 0.484    | 16.186   |
| 0      | 0.197           | -0.981  | 1         | 0.348                     | 0.485    | 16.125   |
| -0.841 | 0.316           | 0.439   | 1         | 0.348                     | 0.484    | 16.186   |

|   |                 |        |           |                           |  |  |
|---|-----------------|--------|-----------|---------------------------|--|--|
|   | Dipole Moment   |        | Magnitude |                           |  |  |
| x | y               | z      |           |                           |  |  |
| 0 | -3.285          | -0.783 | 3.377     | esu*cm                    |  |  |
|   | Cell Volume     |        | 760.05    |                           |  |  |
|   | Z               |        | 4         |                           |  |  |
|   | Dipole Moment = |        | 0.018     | esu*cm/A^3                |  |  |
|   | pm/V            |        | 4.24E+07  | conversion to pm/V cm/A^3 |  |  |

**Total Dipole Moment for P2O7 =**

|   |                                |        |           |                           |  |  |
|---|--------------------------------|--------|-----------|---------------------------|--|--|
|   | Dipole Moment                  |        | Magnitude |                           |  |  |
| x | y                              | z      |           |                           |  |  |
| 0 | 0.691                          | -3.359 | 3.43      |                           |  |  |
|   | Cell Volume                    |        | 760.05    |                           |  |  |
|   | Z                              |        | 4         |                           |  |  |
|   | Total Dipole Moment for P2O7 = |        | 0.018     |                           |  |  |
|   | pm/V                           |        | 4.31E+07  | conversion to pm/V cm/A^3 |  |  |
